# Supplementary material
Source: bioRxiv or medRxiv preprint supplement (https://www.biorxiv.org/highwire/filestream/36702/field_highwire_adjunct_files/7/125211-3.pdf)

rRNA Operon Assembly

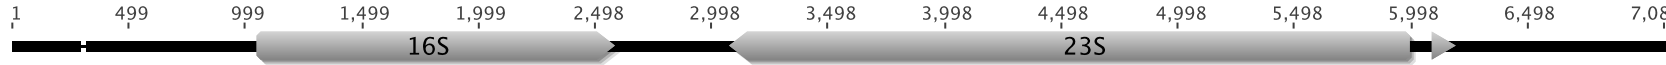

Sanger Reads

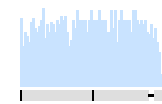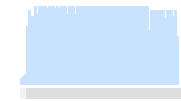

Supplement: Supplementary file [file 125211-3.pdf]
